# Supplementary material for: Validation Study of the Revised Spirituality and Spiritual Care Rating Scale (SSCRS): A Cross-Sectional Survey in Poland
Source: Preprints.org preprint supplement (doi:10.20944/preprints202202.0030.v1), 2022-02-02
Supplement: Supplementary file 1 [file supplementary:Appendix%201%20(Polish%20version%20of%20SSCRS).pdf]

## Appendix 1

Polish and English version<sup>1</sup> of the Spirituality and Spiritual Care Rating Scale (SSCRS).

For each question please circle one answer which best reflects the extent to which you agree or disagree with each statement.

| Item | I believe .....                                                                                                                        | Uważam, że ...                                                                                                                           | 1<br>Strongly<br>Disagree | 2<br>Disagree            | 3<br>Uncertain           | 4<br>Agree               | 5<br>Strongly<br>Agree   |
|------|----------------------------------------------------------------------------------------------------------------------------------------|------------------------------------------------------------------------------------------------------------------------------------------|---------------------------|--------------------------|--------------------------|--------------------------|--------------------------|
| 1    | ... nurses can provide spiritual care by arranging a visit by the hospital Chaplain or the patient's own religious leader if requested | ... pielęgniarki mogą zapewnić opiekę duchową poprzez umożliwienie wizyty kapelana lub innego przewodnika duchowego na życzenie pacjenta | <input type="checkbox"/>  | <input type="checkbox"/> | <input type="checkbox"/> | <input type="checkbox"/> | <input type="checkbox"/> |
| 2    | ... nurses can provide spiritual care by showing kindness, concern and cheerfulness when giving care                                   | ... pielęgniarki mogą zapewnić opiekę duchową okazując życzliwość, troskę oraz dodając otuchy pacjentowi                                 | <input type="checkbox"/>  | <input type="checkbox"/> | <input type="checkbox"/> | <input type="checkbox"/> | <input type="checkbox"/> |
| 3    | ... spirituality is concerned with a need to forgive and a need to be forgiven                                                         | ... duchowość jest związana z potrzebą przebaczenia innym i uzyskania wybaczenia                                                         | <input type="checkbox"/>  | <input type="checkbox"/> | <input type="checkbox"/> | <input type="checkbox"/> | <input type="checkbox"/> |
| 4    | ... spirituality involves only going to Church/Place of Worship                                                                        | ... duchowość wyraża się jedynie poprzez chodzenie do kościoła lub innych miejsc kultu                                                   | <input type="checkbox"/>  | <input type="checkbox"/> | <input type="checkbox"/> | <input type="checkbox"/> | <input type="checkbox"/> |
| 5    | ... spirituality is not concerned with a belief and faith in a God or Supreme being                                                    | ... duchowość nie dotyczy wyłącznie wiary w Boga lub inną siłę wyższą                                                                    | <input type="checkbox"/>  | <input type="checkbox"/> | <input type="checkbox"/> | <input type="checkbox"/> | <input type="checkbox"/> |
| 6    | ... spirituality is about finding meaning in the good and bad events of life                                                           | ... duchowość polega na odnajdowaniu sensu zarówno w dobrych, jak i w złych wydarzeniach w życiu                                         | <input type="checkbox"/>  | <input type="checkbox"/> | <input type="checkbox"/> | <input type="checkbox"/> | <input type="checkbox"/> |
| 7    | ... nurses can provide spiritual care by spending time with a patient giving support and reassurance especially in time of need        | ... pielęgniarki mogą zapewnić pacjentom opiekę duchową poprzez poświęcenie im czasu, udzielanie wsparcia i dodawanie otuchy             | <input type="checkbox"/>  | <input type="checkbox"/> | <input type="checkbox"/> | <input type="checkbox"/> | <input type="checkbox"/> |
| 8    | ... nurses can provide spiritual care by enabling a patient to find meaning and purpose in their illness                               | ... pielęgniarki mogą zapewnić pacjentom opiekę duchową poprzez umożliwienie im znalezienia sensu w chorobie                             | <input type="checkbox"/>  | <input type="checkbox"/> | <input type="checkbox"/> | <input type="checkbox"/> | <input type="checkbox"/> |
| 9    | ... spirituality is about having a sense of hope in life                                                                               | ... duchowość polega na trwaniu w nadziei                                                                                                | <input type="checkbox"/>  | <input type="checkbox"/> | <input type="checkbox"/> | <input type="checkbox"/> | <input type="checkbox"/> |

<sup>1</sup> Original English version of SSCRS published by Wilfred McSherry, Peter Draper, and Don Kendrick. *The construct validity of a rating scale designed to assess spirituality and spiritual care*. International Journal of Nursing Studies, 2002; 39(7): 723-34.

The Polish language version of SSCRS adapted with permission from Wilfred McSherry.

|    |                                                                                                                                              |                                                                                                                         |                          |                          |                          |                          |                          |
|----|----------------------------------------------------------------------------------------------------------------------------------------------|-------------------------------------------------------------------------------------------------------------------------|--------------------------|--------------------------|--------------------------|--------------------------|--------------------------|
| 10 | ... spirituality is to do with the way one conducts one's life here and now                                                                  | ... duchowość to świadome życia tu i teraz                                                                              | <input type="checkbox"/> |
| 11 | ... nurses can provide spiritual care by listening to and allowing patients' time to discuss and explore their fears, anxieties and troubles | ... pielęgniarki mogą zapewnić opiekę duchową poprzez wysłuchanie obaw, niepokojów i zmartwień pacjenta                 | <input type="checkbox"/> |
| 12 | ... spirituality is a unifying force which enables one to be at peace with oneself and the world                                             | ... duchowość jest siłą jednoczącą, która pozwala żyć człowiekowi w harmonii z samym sobą i światem                     | <input type="checkbox"/> |
| 13 | ... spirituality does not include areas such as art, creativity and self-expression                                                          | ... duchowość nie obejmuje takich obszarów jak sztuka, kreatywność i swobodne wyrażanie siebie                          | <input type="checkbox"/> |
| 14 | ... nurses can provide spiritual care by having respect for privacy, dignity and religious and cultural beliefs of a patient                 | ... pielęgniarki mogą zapewnić opiekę duchową szanując prywatność, godność oraz wartości religijne i kulturowe pacjenta | <input type="checkbox"/> |
| 15 | ... spirituality involves personal friendships, relationships                                                                                | ... duchowość dotyczy przyjaźni i relacji międzyludzkich                                                                | <input type="checkbox"/> |
| 16 | ... spirituality does not apply to Atheists or Agnostics                                                                                     | ... duchowość nie dotyczy ateistów lub agnostyków                                                                       | <input type="checkbox"/> |
| 17 | ... spirituality includes people's morals                                                                                                    | ... moralność jest częścią duchowości                                                                                   | <input type="checkbox"/> |
