# Supplementary material for: Validation Study of the Revised Spirituality and Spiritual Care Rating Scale (SSCRS): A Cross-Sectional Survey in Poland
Source: Preprints.org preprint supplement (doi:10.20944/preprints202202.0030.v1), 2022-02-02
Supplement: Supplementary file 2 [file supplementary:Appendix%202%20(Results%20of%20additional%20analysis).pdf]

**Table S1.** Internal consistency

| Item      | M    | SD   | Skew  | Kurtosis | Item-total correlation | Cronbach alfa |
|-----------|------|------|-------|----------|------------------------|---------------|
| SSCRS_1   | 4.12 | 1.31 | -1.41 | 0.71     | 0.64                   | 0.898         |
| SSCRS_2   | 4.09 | 1.29 | -1.42 | 0.79     | 0.69                   |               |
| SSCRS_3   | 3.72 | 1.17 | -0.67 | -0.31    | 0.58                   |               |
| SSCRS_5   | 3.55 | 1.39 | -0.60 | -0.93    | 0.38                   |               |
| SSCRS_6   | 3.89 | 1.19 | -1.04 | 0.25     | 0.69                   |               |
| SSCRS_7   | 3.99 | 1.19 | -1.21 | 0.57     | 0.77                   |               |
| SSCRS_14  | 4.11 | 1.13 | -1.35 | 1.07     | 0.75                   |               |
| SSCRS_15  | 3.86 | 1.14 | -0.85 | -0.04    | 0.68                   | 0.873         |
| SSCRS_17  | 3.83 | 1.19 | -0.90 | 0.01     | 0.55                   |               |
| SSCRS_8   | 3.58 | 1.24 | -0.57 | -0.59    | 0.54                   |               |
| SSCRS_9   | 3.63 | 1.16 | -0.58 | -0.37    | 0.56                   |               |
| SSCRS_10  | 3.58 | 1.21 | -0.56 | -0.49    | 0.51                   |               |
| SSCRS_11  | 3.85 | 1.23 | -0.97 | -0.07    | 0.66                   |               |
| SSCRS_12  | 3.75 | 1.23 | -0.79 | -0.31    | 0.62                   |               |
| SSCRS_4*  | 4.07 | 1.26 | -1.27 | 0.47     | 0.43                   | 0.563         |
| SSCRS_13* | 3.17 | 1.27 | 0.01  | -0.99    | 0.14                   |               |
| SSCRS_16* | 3.66 | 1.25 | -0.62 | -0.50    | 0.36                   |               |

M – mean, SD – standard deviation

\* reverse score items

**Table S2.** Criterion validity

|                                          | Activity-centred spiritual care | Emotional support-centred spiritual care | Religiosity |
|------------------------------------------|---------------------------------|------------------------------------------|-------------|
| Activity-centred spiritual care          | 1 .000                          |                                          |             |
| Emotional support-centred spiritual care | 0.568                           | 1.000                                    |             |
| Religiosity                              | -0.406                          | -0.199                                   | 1.000       |

For all correlations P-value = 0.000 (bilateral)
